# Supplementary material for: Sodium Content in Pre-Packaged Foods in China: A Food Label Analysis
Source: MDPI journal article supplement (doi:10.3390/nu15234862), 2023-11-21
Supplement: s1 [file s1]

Supplementary Materials :

**Table S1.** Reference standards for the classification of Pre-packaged Foods in China

| Food category                            | Subcategory            | Type of standards                    | Standard                                                                                                                                                                                                                                                                                                                                |
|------------------------------------------|------------------------|--------------------------------------|-----------------------------------------------------------------------------------------------------------------------------------------------------------------------------------------------------------------------------------------------------------------------------------------------------------------------------------------|
| Chocolate, sugar confectionery and Jelly |                        | national standards, health standards | The Standard on Nutrition Labelling of Prepackaged Foods (GB 28050-2011), The Standards for Uses of Food Additive (GB 2760-2014), Regulation of Food Composition Data Expression (WS/T 464-2015), Confectionery (GB17399-2016), Chocolate, cocoa butter substitute chocolate and their products (GB 9678.2-2014), Jelly (GB 19299-2015) |
|                                          |                        |                                      |                                                                                                                                                                                                                                                                                                                                         |
| Cake, and pastry products                |                        |                                      | The Standard on Nutrition Labelling of Prepackaged Foods (GB 28050-2011), The Standards for Uses of Food Additive (GB 2760-2014), Regulation of Food Composition Data Expression (WS/T 464-2015), Pastry, Bread (GB 7099-2015), Moon cake (GB/T 19855-2015)                                                                             |
|                                          | Moon cakes             | national standards, health standards | The Standard on Nutrition Labelling of Prepackaged Foods (GB 28050-2011), The Standards for Uses of Food Additive (GB 2760-2014), Regulation of Food Composition Data Expression (WS/T 464-2015), Pastry, Bread (GB 7099-2015), Moon cake (GB/T 19855-2015)                                                                             |
|                                          | Chinese pastries       | national standards, health standards | The Standard on Nutrition Labelling of Prepackaged Foods (GB 28050-2011), The Standards for Uses of Food Additive (GB 2760-2014), Regulation of Food Composition Data Expression (WS/T 464-2015), Pastry, Bread (GB 7099-2015)                                                                                                          |
|                                          | Western-style pastries | national standards, health standards | The Standard on Nutrition Labelling of Prepackaged Foods (GB 28050-2011), The Standards for Uses of Food Additive (GB 2760-2014), Regulation of Food Composition Data Expression (WS/T 464-2015), Pastry, Bread (GB 7099-2015)                                                                                                          |
| Biscuit                                  |                        | national standards, health standards | The Standard on Nutrition Labelling of Prepackaged Foods (GB 28050-2011), The Standards for Uses of Food Additive (GB 2760-2014), Regulation of Food Composition Data Expression (WS/T 464-2015), Biscuit (GB 7100-2015)                                                                                                                |
|                                          | Sandwich biscuits      | national standards,                  | The Standard on Nutrition Labelling of Prepackaged Foods (GB 28050-2011), The                                                                                                                                                                                                                                                           |

|             |                                                                |                                                                                                                                                                                                                                                                                                                                                                                                                  |
|-------------|----------------------------------------------------------------|------------------------------------------------------------------------------------------------------------------------------------------------------------------------------------------------------------------------------------------------------------------------------------------------------------------------------------------------------------------------------------------------------------------|
| Snack foods | health standards                                               | Standards for Uses of Food Additive (GB 2760-2014), Regulation of Food Composition Data Expression (WS/T 464-2015), Biscuit (GB 7100-2015)                                                                                                                                                                                                                                                                       |
|             | Wafer biscuits                                                 | The Standard on Nutrition Labelling of Prepackaged Foods (GB 28050-2011), The Standards for Uses of Food Additive (GB 2760-2014), Regulation of Food Composition Data Expression (WS/T 464-2015), Biscuit (GB 7100-2015)                                                                                                                                                                                         |
|             | Cookies                                                        | The Standard on Nutrition Labelling of Prepackaged Foods (GB 28050-2011), The Standards for Uses of Food Additive (GB 2760-2014), Regulation of Food Composition Data Expression (WS/T 464-2015), Biscuit (GB 7100-2015)                                                                                                                                                                                         |
|             | Soda biscuits                                                  | The Standard on Nutrition Labelling of Prepackaged Foods (GB 28050-2011), The Standards for Uses of Food Additive (GB 2760-2014), Regulation of Food Composition Data Expression (WS/T 464-2015), Biscuit (GB 7100-2015)                                                                                                                                                                                         |
|             | Egg roll                                                       | The Standard on Nutrition Labelling of Prepackaged Foods (GB 28050-2011), The Standards for Uses of Food Additive (GB 2760-2014), Regulation of Food Composition Data Expression (WS/T 464-2015), Biscuit (GB 7100-2015)                                                                                                                                                                                         |
|             | Other biscuits                                                 | The Standard on Nutrition Labelling of Prepackaged Foods (GB 28050-2011), The Standards for Uses of Food Additive (GB 2760-2014), Regulation of Food Composition Data Expression (WS/T 464-2015), Biscuit (GB 7100-2015)                                                                                                                                                                                         |
|             | national standards, health standards, light industry standards | The Standard on Nutrition Labelling of Prepackaged Foods (GB 28050-2011), The Standards for Uses of Food Additive (GB 2760-2014), Regulation of Food Composition Data Expression (WS/T 464-2015), Extruded snacks (GB 17401-2014), Extruded flavouring noodles (QB/T 5729-2022), General rule for the quality of preserved fruits (GB/T 10782-2021), Non-fried vegetable and fruit crisp chips (GB/T 23787-2009) |
|             | Crisps                                                         | The Standard on Nutrition Labelling of Prepackaged Foods (GB 28050-2011), The Standards for Uses of Food Additive (GB 2760-2014), Regulation of Food Composition Data Expression (WS/T 464-2015), Extruded snacks (GB 17401-2014)                                                                                                                                                                                |

|             |                                        |                                                                      |                                                                                                                                                                                                                                                                      |
|-------------|----------------------------------------|----------------------------------------------------------------------|----------------------------------------------------------------------------------------------------------------------------------------------------------------------------------------------------------------------------------------------------------------------|
|             | Extruded snacks<br>(except for crisps) | national standards,<br>health standards                              | The Standard on Nutrition Labelling of Prepackaged Foods (GB 28050-2011), The Standards for Uses of Food Additive (GB 2760-2014), Regulation of Food Composition Data Expression (WS/T 464-2015), Extruded snacks (GB 17401-2014)                                    |
|             | Nuts and seeds                         | national standards,<br>health standards                              | The Standard on Nutrition Labelling of Prepackaged Foods (GB 28050-2011), The Standards for Uses of Food Additive (GB 2760-2014), Regulation of Food Composition Data Expression (WS/T 464-2015)                                                                     |
|             | Extruded flavouring<br>noodles         | national standards,<br>health standards, light<br>industry standards | The Standard on Nutrition Labelling of Prepackaged Foods (GB 28050-2011), The Standards for Uses of Food Additive (GB 2760-2014), Regulation of Food Composition Data Expression (WS/T 464-2015), Extruded flavouring noodles (QB/T 5729-2022)                       |
|             | Preserves                              | national standards,<br>health standards                              | The Standard on Nutrition Labelling of Prepackaged Foods (GB 28050-2011), The Standards for Uses of Food Additive (GB 2760-2014), Regulation of Food Composition Data Expression (WS/T 464-2015), General rule for the quality of preserved fruits (GB/T 10782-2021) |
|             | Dried fruit                            | national standards,<br>health standards                              | The Standard on Nutrition Labelling of Prepackaged Foods (GB 28050-2011), The Standards for Uses of Food Additive (GB 2760-2014), Regulation of Food Composition Data Expression (WS/T 464-2015), Non-fried vegetable and fruit crisp chips (GB/T 23787-2009)        |
|             | Soybean curd slab                      | national standards,<br>health standards                              | The Standard on Nutrition Labelling of Prepackaged Foods (GB 28050-2011), The Standards for Uses of Food Additive (GB 2760-2014), Regulation of Food Composition Data Expression (WS/T 464-2015)                                                                     |
| Beverages   |                                        | national standards,<br>health standards                              | The Standard on Nutrition Labelling of Prepackaged Foods (GB 28050-2011), The Standards for Uses of Food Additive (GB 2760-2014), Regulation of Food Composition Data Expression (WS/T 464-2015), Beverage (GB 7101-2022)                                            |
| Edible ices |                                        | national standards,<br>health standards                              | The Standard on Nutrition Labelling of Prepackaged Foods (GB 28050-2011), The Standards for Uses of Food Additive (GB 2760-2014), Regulation of Food                                                                                                                 |

|                                                  |                                                                      |                                                                                                                                                                                                                                                                                                                                                                                                                                                            |
|--------------------------------------------------|----------------------------------------------------------------------|------------------------------------------------------------------------------------------------------------------------------------------------------------------------------------------------------------------------------------------------------------------------------------------------------------------------------------------------------------------------------------------------------------------------------------------------------------|
| Yogurt, sour milk,<br>cream and similar<br>foods | national standards,<br>health standards,                             | Composition Data Expression (WS/T 464-2015), Frozen drinks-Ice cream (GB/T 31114-2014), Frozen drinks-Ice milk (GB/T 31119-2014)                                                                                                                                                                                                                                                                                                                           |
|                                                  |                                                                      | The Standard on Nutrition Labelling of Prepackaged Foods (GB 28050-2011), The Standards for Uses of Food Additive (GB 2760-2014), Regulation of Food Composition Data Expression (WS/T 464-2015), National food safety standard Pasteurized milk (GB 19645—2010), National food safety standard Sterilized milk (GB 25190—2010), National food safety standard Modified milk (GB 25191—2010), National food safety standard Fermented milk (GB 19302—2010) |
| Cheese                                           | national standards,<br>health standards                              | The Standard on Nutrition Labelling of Prepackaged Foods (GB 28050-2011), The Standards for Uses of Food Additive (GB 2760-2014), Regulation of Food Composition Data Expression (WS/T 464-2015)                                                                                                                                                                                                                                                           |
| Convenience foods                                | national standards,<br>health standards, light<br>industry standards | The Standard on Nutrition Labelling of Prepackaged Foods (GB 28050-2011), The Standards for Uses of Food Additive (GB 2760-2014), Regulation of Food Composition Data Expression (WS/T 464-2015), Instant noodles (GB/T 40772-2021), Instant rice (GB/T 31323-2014), Instant rice noodles (QB/T 2652-2004)                                                                                                                                                 |
| Frozen rice and flour<br>products                | national standards,<br>health standards                              | The Standard on Nutrition Labelling of Prepackaged Foods (GB 28050-2011), The Standards for Uses of Food Additive (GB 2760-2014), Regulation of Food Composition Data Expression (WS/T 464-2015), Quick-frozen dumpling (GB/T 23786-2009)                                                                                                                                                                                                                  |
| Cereals                                          | national standards,<br>health standards, local<br>standards          | The Standard on Nutrition Labelling of Prepackaged Foods (GB 28050-2011), The Standards for Uses of Food Additive (GB 2760-2014), Regulation of Food Composition Data Expression (WS/T 464-2015), Rolled oats (DB15/T 22952021)                                                                                                                                                                                                                            |
| Congee                                           | national standards,<br>health standards                              | The Standard on Nutrition Labelling of Prepackaged Foods (GB 28050-2011), The Standards for Uses of Food Additive (GB 2760-2014), Regulation of Food Composition Data Expression (WS/T 464-2015), Convenience soup (T/ZSSP 0005-2021)                                                                                                                                                                                                                      |

|                           |                                                                                    |                                                                                                                                                                                                                                                                                                                                                                                                                                                                                                                                                                                                                                                                                            |
|---------------------------|------------------------------------------------------------------------------------|--------------------------------------------------------------------------------------------------------------------------------------------------------------------------------------------------------------------------------------------------------------------------------------------------------------------------------------------------------------------------------------------------------------------------------------------------------------------------------------------------------------------------------------------------------------------------------------------------------------------------------------------------------------------------------------------|
| Edible oil                | national standards,<br>health standards                                            | The Standard on Nutrition Labelling of Prepackaged Foods (GB 28050-2011), The Standards for Uses of Food Additive (GB 2760-2014), Regulation of Food Composition Data Expression (WS/T 464-2015), vegetable oil (GB 2716--2018)                                                                                                                                                                                                                                                                                                                                                                                                                                                            |
| Bread and bakery products | national standards,<br>health standards                                            | The Standard on Nutrition Labelling of Prepackaged Foods (GB 28050-2011), The Standards for Uses of Food Additive (GB 2760-2014), Regulation of Food Composition Data Expression (WS/T 464-2015), Pastry, bread (GB 7099-2015)                                                                                                                                                                                                                                                                                                                                                                                                                                                             |
| Sweet breads              | national standards,<br>health standards                                            | The Standard on Nutrition Labelling of Prepackaged Foods (GB 28050-2011), The Standards for Uses of Food Additive (GB 2760-2014), Regulation of Food Composition Data Expression (WS/T 464-2015), Pastry, bread (GB 7099-2015)                                                                                                                                                                                                                                                                                                                                                                                                                                                             |
| Leavened breads           | national standards,<br>health standards                                            | The Standard on Nutrition Labelling of Prepackaged Foods (GB 28050-2011), The Standards for Uses of Food Additive (GB 2760-2014), Regulation of Food Composition Data Expression (WS/T 464-2015), Pastry, bread (GB 7099-2015)                                                                                                                                                                                                                                                                                                                                                                                                                                                             |
| Fine dried noodles        | national standards,<br>health standards                                            | The Standard on Nutrition Labelling of Prepackaged Foods (GB 28050-2011), The Standards for Uses of Food Additive (GB 2760-2014), Regulation of Food Composition Data Expression (WS/T 464-2015), Dried noodle (GB/T 40636-2021)                                                                                                                                                                                                                                                                                                                                                                                                                                                           |
| Processed meat products   | national standards,<br>health standards,<br>industry standards,<br>group standards | The Standard on Nutrition Labelling of Prepackaged Foods (GB 28050-2011), The Standards for Uses of Food Additive (GB 2760-2014), Regulation of Food Composition Data Expression (WS/T 464-2015), Cured Meat Products (GB 2730-2015), Prefabricated Seasoned Meat Products (T/FJSP 0006-2020), Soy Sauce and Pot-roast Meat Products (GB/T 23586-2009), Dried Meat Floss (GB/T 23968-2009), Dried Meat Dice (GB/T 23969-2009), Dried Meat Slice (GB/T 31406-2015), Bacon (GB/T 23492-2009), Canned Steamed Beef (GB/T 13514-1992), Canned Pork in Natural Juice (GB/T 13513-1992), Canned Steamed Pork (QB/T 2786-2006), Cooked Crued Ham (GB/T 20711-2006), Ham Sausage (GB/T 20712-2006) |

|                                             |                                                                |                                                                                                                                                                                                                                                                                                                                                                    |
|---------------------------------------------|----------------------------------------------------------------|--------------------------------------------------------------------------------------------------------------------------------------------------------------------------------------------------------------------------------------------------------------------------------------------------------------------------------------------------------------------|
| Cured meat products                         | national standards,<br>health standards                        | The Standard on Nutrition Labelling of Prepackaged Foods (GB 28050-2011), The Standards for Uses of Food Additive (GB 2760-2014), Regulation of Food Composition Data Expression (WS/T 464-2015), Cured Meat Products (GB 2730-2015)                                                                                                                               |
| Soy sauce and<br>pot-roast meat<br>products | national standards,<br>health standards,                       | The Standard on Nutrition Labelling of Prepackaged Foods (GB 28050-2011), The Standards for Uses of Food Additive (GB 2760-2014), Regulation of Food Composition Data Expression (WS/T 464-2015), Soy Sauce and Pot-roast Meat Products (GB/T 23586-2009)                                                                                                          |
| Smoked and roasted<br>meat products         | national standards,<br>health standards                        | The Standard on Nutrition Labelling of Prepackaged Foods (GB 28050-2011), The Standards for Uses of Food Additive (GB 2760-2014), Regulation of Food Composition Data Expression (WS/T 464-2015), Bacon (GB/T 23492-2009)                                                                                                                                          |
| Sausage meat products                       | national standards,<br>health standards                        | The Standard on Nutrition Labelling of Prepackaged Foods (GB 28050-2011), The Standards for Uses of Food Additive (GB 2760-2014), Regulation of Food Composition Data Expression (WS/T 464-2015), Cooked Cured Ham (GB/T 20711-2006), Ham Sausage (GB/T 20712-2006)                                                                                                |
| Dried meat products                         | national standards,<br>health standards                        | The Standard on Nutrition Labelling of Prepackaged Foods (GB 28050-2011), The Standards for Uses of Food Additive (GB 2760-2014), Regulation of Food Composition Data Expression (WS/T 464-2015), Dried Meat Floss (GB/T 23968-2009), Dried Meat Dice (GB/T 23969-2009), Dried Meat Slice (GB/T 31406-2015)                                                        |
| Canned meat                                 | national standards,<br>health standards,<br>industry standards | The Standard on Nutrition Labelling of Prepackaged Foods (GB 28050-2011), The Standards for Uses of Food Additive (GB 2760-2014), Regulation of Food Composition Data Expression (WS/T 464-2015), Canned Stewed Beef (QB/T 1363-1991), Canned Steamed Beef (GB/T 13514-1992), Canned Pork in Natural Juice (GB/T 13513-1992), Canned Steamed Pork (QB/T 2786-2006) |
| Prepared meat                               | national standards,                                            | The Standard on Nutrition Labelling of Prepackaged Foods (GB 28050-2011), The                                                                                                                                                                                                                                                                                      |

|                            |                                          |                                                       |                                                                                                                                                                                                                                                                                                                                                                                                                                                                                                                                                                                                                                                                                            |
|----------------------------|------------------------------------------|-------------------------------------------------------|--------------------------------------------------------------------------------------------------------------------------------------------------------------------------------------------------------------------------------------------------------------------------------------------------------------------------------------------------------------------------------------------------------------------------------------------------------------------------------------------------------------------------------------------------------------------------------------------------------------------------------------------------------------------------------------------|
| Processed poultry products | products                                 | health standards, group standards                     | Standards for Uses of Food Additive (GB 2760-2014), Regulation of Food Composition Data Expression (WS/T 464-2015), Prefabricated Seasoned Meat Products (T/FJSP 0006-2020)                                                                                                                                                                                                                                                                                                                                                                                                                                                                                                                |
|                            |                                          | national standards, health standards, group standards | The Standard on Nutrition Labelling of Prepackaged Foods (GB 28050-2011), The Standards for Uses of Food Additive (GB 2760-2014), Regulation of Food Composition Data Expression (WS/T 464-2015), Cured Meat Products (GB 2730-2015), Prefabricated Seasoned Meat Products (T/FJSP 0006-2020), Soy Sauce and Pot-roast Meat Products (GB/T 23586-2009), Dried Meat Floss (GB/T 23968-2009), Dried Meat Dice (GB/T 23969-2009), Dried Meat Slice (GB/T 31406-2015), Bacon (GB/T 23492-2009), Canned Steamed Beef (GB/T 13514-1992), Canned Pork in Natural Juice (GB/T 13513-1992), Canned Steamed Pork (QB/T 2786-2006), Cooked Crued Ham (GB/T 20711-2006), Ham Sausage (GB/T 20712-2006) |
|                            | Soy sauce and pot-roast poultry products | national standards, health standards                  | The Standard on Nutrition Labelling of Prepackaged Foods (GB 28050-2011), The Standards for Uses of Food Additive (GB 2760-2014), Regulation of Food Composition Data Expression (WS/T 464-2015), Soy Sauce and Pot-roast Meat Products (GB/T 23586-2009)                                                                                                                                                                                                                                                                                                                                                                                                                                  |
|                            | Smoked and roasted poultry products      | national standards, health standards                  | The Standard on Nutrition Labelling of Prepackaged Foods (GB 28050-2011), The Standards for Uses of Food Additive (GB 2760-2014), Regulation of Food Composition Data Expression (WS/T 464-2015), Bacon (GB/T 23492-2009)                                                                                                                                                                                                                                                                                                                                                                                                                                                                  |
|                            | Sausage poultry products                 | national standards, health standards                  | The Standard on Nutrition Labelling of Prepackaged Foods (GB 28050-2011), The Standards for Uses of Food Additive (GB 2760-2014), Regulation of Food Composition Data Expression (WS/T 464-2015), Cooked Crued Ham (GB/T 20711-2006), Ham Sausage (GB/T 20712-2006)                                                                                                                                                                                                                                                                                                                                                                                                                        |
|                            | Prepared poultry products                | national standards, health standards, group           | The Standard on Nutrition Labelling of Prepackaged Foods (GB 28050-2011), The Standards for Uses of Food Additive (GB 2760-2014), Regulation of Food                                                                                                                                                                                                                                                                                                                                                                                                                                                                                                                                       |

|                            |                                  |                                                          |                                                                                                                                                                                                                                                                                                                                                                                          |
|----------------------------|----------------------------------|----------------------------------------------------------|------------------------------------------------------------------------------------------------------------------------------------------------------------------------------------------------------------------------------------------------------------------------------------------------------------------------------------------------------------------------------------------|
|                            |                                  | standards                                                | Composition Data Expression (WS/T 464-2015), Prefabricated Seasoned Meat Products (T/FJSP 0006-2020)                                                                                                                                                                                                                                                                                     |
| Processed fish products    |                                  | national standards, health standards                     | The Standard on Nutrition Labelling of Prepackaged Foods (GB 28050-2011), The Standards for Uses of Food Additive (GB 2760-2014), Regulation of Food Composition Data Expression (WS/T 464-2015), National Food Safety Standards of Animal derived aquatic products (GB 10136-2015)                                                                                                      |
|                            | Cooked fish and seafood products | national standards, health standards                     | The Standard on Nutrition Labelling of Prepackaged Foods (GB 28050-2011), The Standards for Uses of Food Additive (GB 2760-2014), National Food Safety Standards of Animal derived aquatic products (GB 10136-2015)                                                                                                                                                                      |
|                            | Canned fish                      | national standards, health standards                     | The Standard on Nutrition Labelling of Prepackaged Foods (GB 28050-2011), The Standards for Uses of Food Additive (GB 2760-2014), National Food Safety Standards of Animal derived aquatic products (GB 10136-2015)                                                                                                                                                                      |
|                            | Other fish products              | national standards, health standards                     | The Standard on Nutrition Labelling of Prepackaged Foods (GB 28050-2011), The Standards for Uses of Food Additive (GB 2760-2014), National Food Safety Standards of Animal derived aquatic products (GB 10136-2015)                                                                                                                                                                      |
| Processed egg products     |                                  | national standards, health standards                     | The Standard on Nutrition Labelling of Prepackaged Foods (GB 28050-2011), The Standards for Uses of Food Additive (GB 2760-2014), Regulation of Food Composition Data Expression (WS/T 464-2015), Eggs and egg products (GB 2749-2015)                                                                                                                                                   |
| Sauces, dips and dressings |                                  | national standards, health standards, industry standards | The Standard on Nutrition Labelling of Prepackaged Foods (GB 28050-2011), The Standards for Uses of Food Additive (GB 2760-2014), Regulation of Food Composition Data Expression (WS/T 464-2015), Classification of condiment (GB/T 20903-2007), Soy sauces (GB 2717-2018), Pickled vegetables (GB 2714-2015), Fermented bean curd (SB/T 10302-1999), Compound seasoning (GB 31644-2018) |
|                            | Soy sauces                       | national standards,                                      | The Standard on Nutrition Labelling of Prepackaged Foods (GB 28050-2011), The                                                                                                                                                                                                                                                                                                            |



|                         |                                                                |                                                                                                                                                                                                                                                                                        |
|-------------------------|----------------------------------------------------------------|----------------------------------------------------------------------------------------------------------------------------------------------------------------------------------------------------------------------------------------------------------------------------------------|
|                         | health standards                                               | Standards for Uses of Food Additive (GB 2760-2014), Regulation of Food Composition Data Expression (WS/T 464-2015), Classification of condiment (GB/T 20903-2007), Soy sauces (GB 2717-2018)                                                                                           |
| Pickled vegetables      | national standards,<br>health standards                        | The Standard on Nutrition Labelling of Prepackaged Foods (GB 28050-2011), The Standards for Uses of Food Additive (GB 2760-2014), Regulation of Food Composition Data Expression (WS/T 464-2015), Classification of condiment (GB/T 20903-2007), Pickled vegetables (GB 2714-2015)     |
| Fermented bean curd     | national standards,<br>health standards,<br>industry standards | The Standard on Nutrition Labelling of Prepackaged Foods (GB 28050-2011), The Standards for Uses of Food Additive (GB 2760-2014), Regulation of Food Composition Data Expression (WS/T 464-2015), Classification of condiment (GB/T 20903-2007), Fermented bean curd (SB/T 10302-1999) |
| Paste and like products | national standards,<br>health standards                        | The Standard on Nutrition Labelling of Prepackaged Foods (GB 28050-2011), The Standards for Uses of Food Additive (GB 2760-2014), Regulation of Food Composition Data Expression (WS/T 464-2015), Classification of condiment (GB/T 20903-2007)                                        |
| Compound seasoning      | national standards,<br>health standards                        | The Standard on Nutrition Labelling of Prepackaged Foods (GB 28050-2011), The Standards for Uses of Food Additive (GB 2760-2014), Regulation of Food Composition Data Expression (WS/T 464-2015), Classification of condiment (GB/T 20903-2007), Compound seasoning (GB 31644-2018)    |
